# Supplementary material for: Disinfectant-Assisted Preparation of Hierarchical ZSM-5 Zeolite with Excellent Catalytic Stabilities in Propane Aromatization
Source: MDPI journal article supplement (doi:10.3390/nano14090802), 2024-05-05
Supplement: s1 [file s1]

## Supplementary Material

# Disinfectant-Assisted Preparation of Hierarchical ZSM-5 Zeolite with Excellent Catalytic Stabilities in Propane Aromatization

Peng Zhang <sup>1</sup>, Jianguo Zhuang <sup>1</sup>, Jisheng Yu <sup>1</sup>, Yingjie Guan <sup>1</sup>, Xuedong Zhu <sup>1,\*</sup>  
and Fan Yang <sup>2,\*</sup>

<sup>1</sup> Engineering Research Center of Large-Scale Reactor Engineering and Technology, East China University of Science & Technology, Ministry of Education, Shanghai 200237, China; zhangpengxxx123@163.com (P.Z.)

<sup>2</sup> State Key Laboratory of Green Chemical Engineering and Industrial Catalysis, Sinopec Shanghai Research Institute of Petrochemical Technology Co., Ltd., Shanghai 201208, China

\* Correspondence: xdzhu@ecust.edu.cn (X.Z.);  
yangfan.sshy@sinopec.com (F.Y.)

## List of contents

Fig. S1. XRD patterns of TBTCP-ZSM-5, DDAC-ZSM-5 and DDBAC-ZSM-5.

Fig. S2. SEM micrographs of TBTCP-ZSM-5(a), DDAC-ZSM-5(b) and DDBAC-ZSM-5(c).

Fig. S3. NH<sub>3</sub>-TPD desorption curves of Zn/MTBBP-ZSM-5 and Zn/C-ZSM-5.

Fig. S4. Py-IR spectra of Zn/MTBBP-ZSM-5 and Zn/C-ZSM-5.

Fig. S5. XRD patterns of synthesized MTBBP-ZSM-5 within 1 hour.

Fig. S6. SEM micrographs of synthesized MTBBP-ZSM-5 within 1 hour.

Fig. S7. SEM micrographs of MTBBP-ZSM-5(a), TBTCP-ZSM-5(b), DDAC-ZSM-5(c) and DDBAC-ZSM-5(d) synthesized with Na/Al = 0.5.

Fig. S8. XRD patterns of synthesized samples with Na/Al = 0.5.

Fig. S9. SEM micrograph of MTBBP-ZSM-5 synthesized with Na/Al = 0.

Table S1. Textural properties of the synthesized samples derived from N<sub>2</sub> adsorption-desorption isotherms.

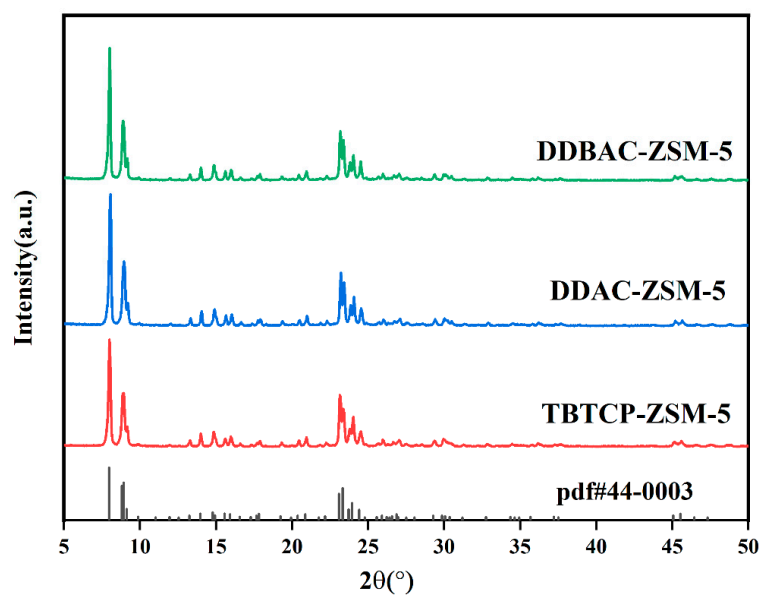

Fig. S1. XRD patterns of TBTCP-ZSM-5, DDAC-ZSM-5 and DDBAC-ZSM-5.

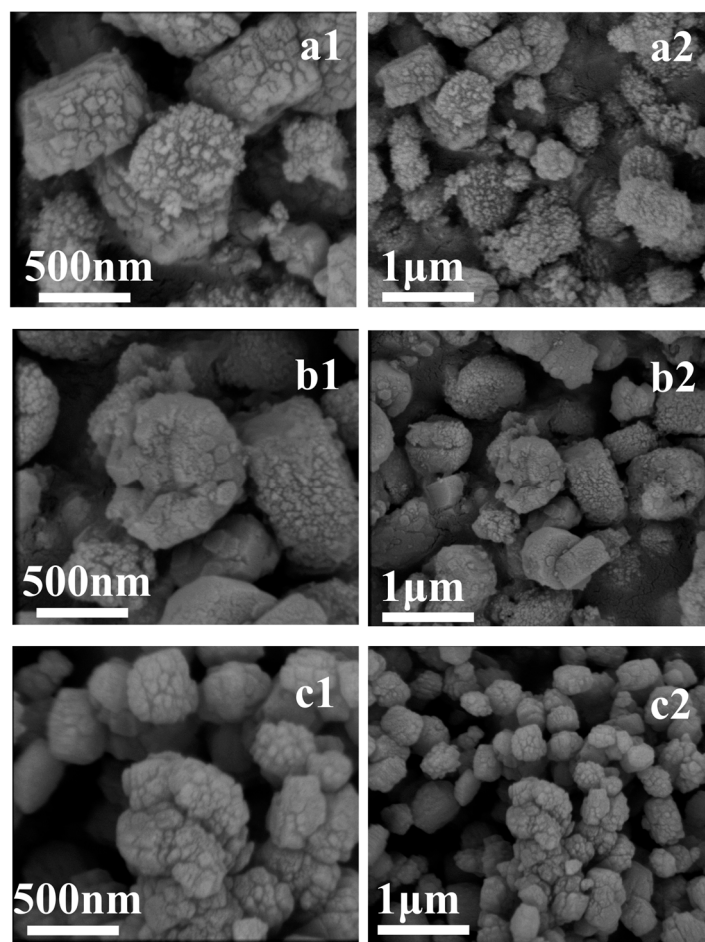

Fig. S2. SEM micrographs of TBTCP-ZSM-5(a), DDAC-ZSM-5(b) and DDBAC-ZSM-5(c).

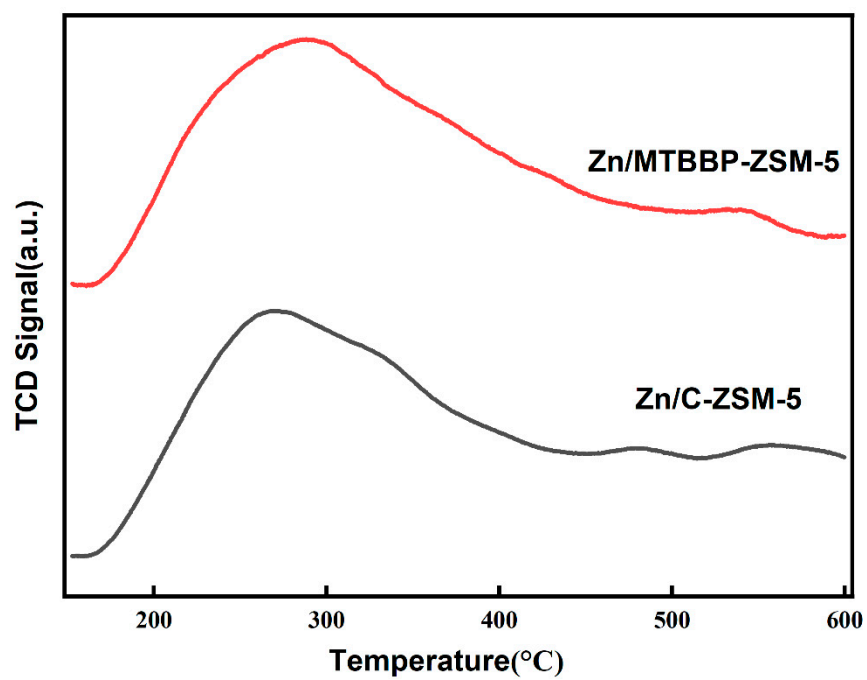

Fig. S3.  $\text{NH}_3$ -TPD desorption curves of Zn/MTBBP-ZSM-5 and Zn/C-ZSM-5.

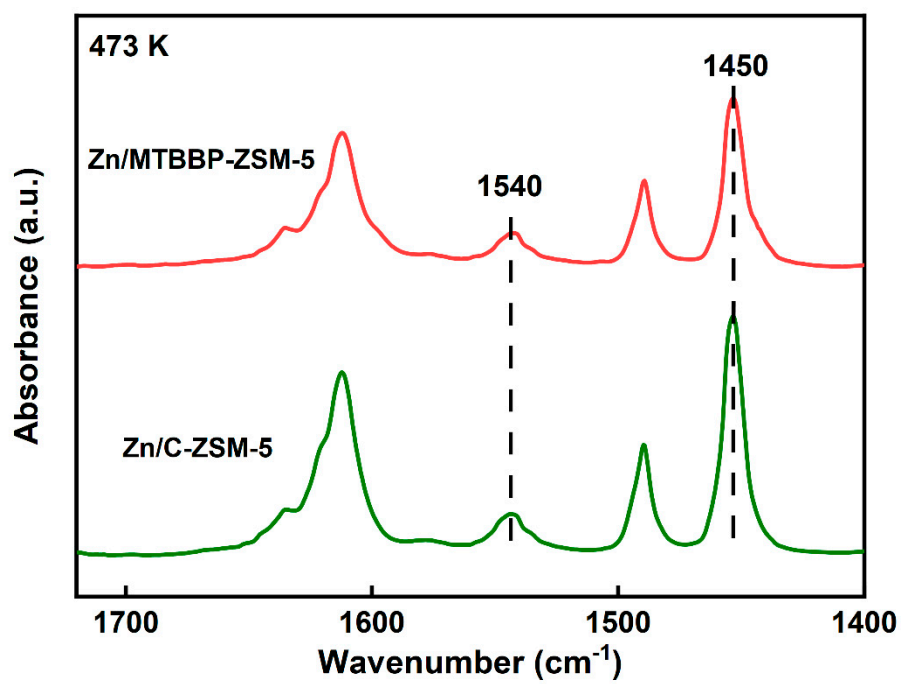

Fig. S4. Py-IR spectra of Zn/MTBBP-ZSM-5 and Zn/C-ZSM-5.

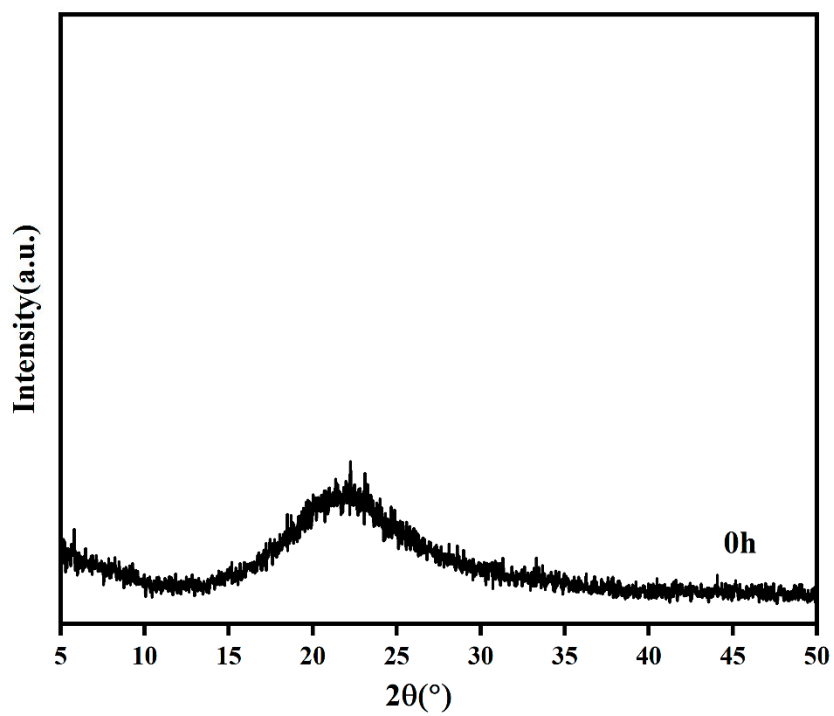

Fig. S5. XRD patterns of synthesized MTBBP-ZSM-5 within 1 hour.

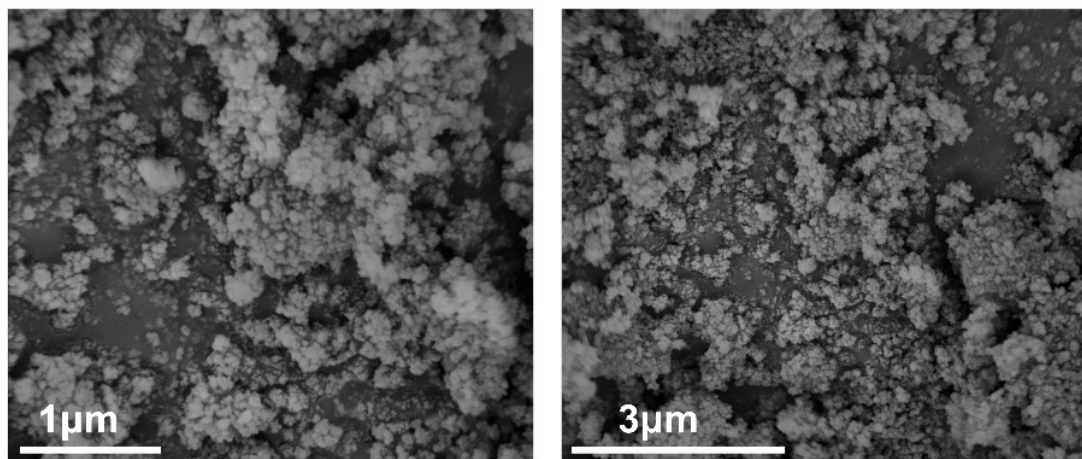

Fig. S6. SEM micrographs of synthesized MTBBP-ZSM-5 within 1 hour.



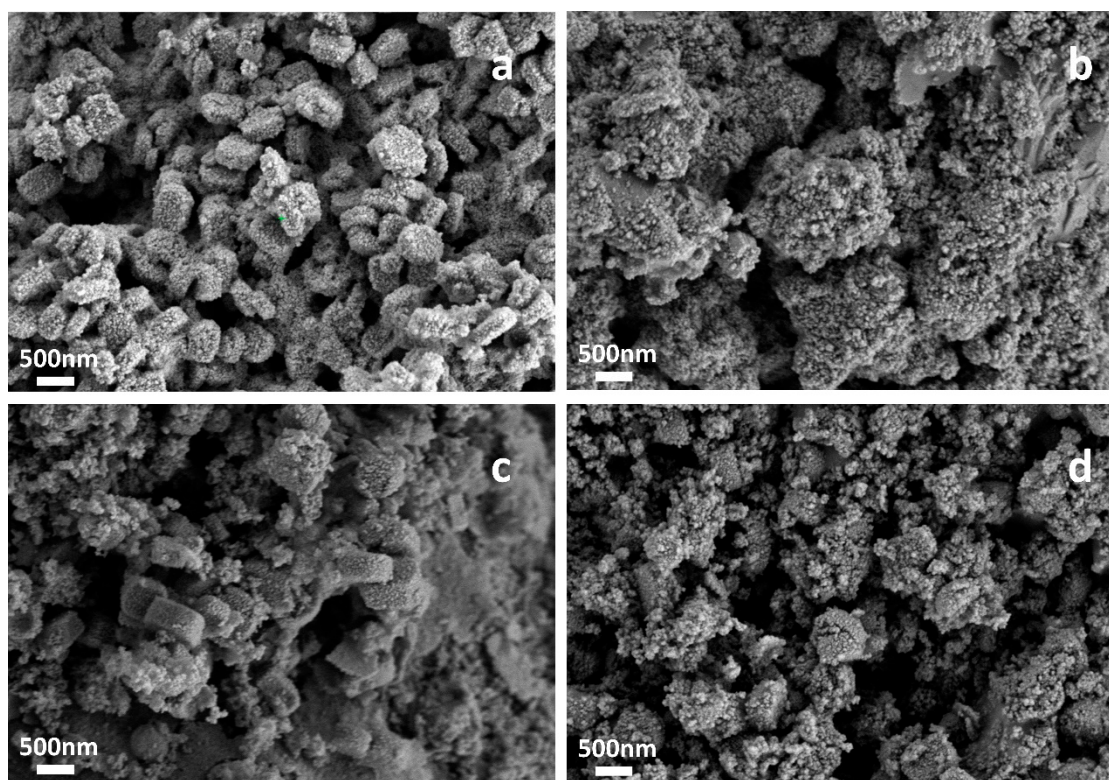

Fig. S7. SEM micrographs of MTBBP-ZSM-5(a), TBTCP-ZSM-5(b), DDAC-ZSM-5(c) and DDBAC-ZSM-5(d) synthesized with  $\text{Na}/\text{Al} = 0.5$ .

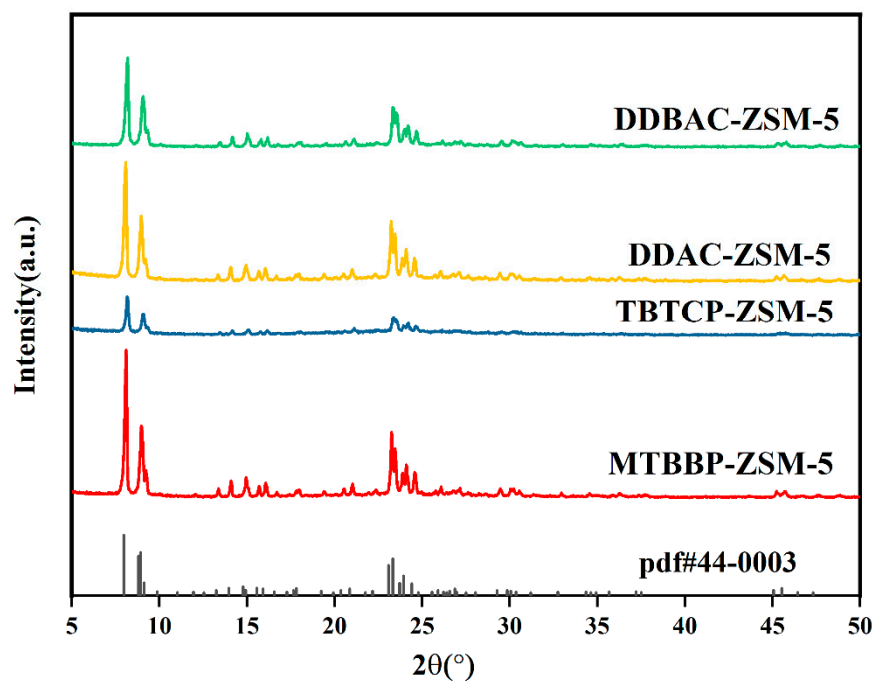

Fig. S8. XRD patterns of synthesized samples with Na/Al = 0.5.

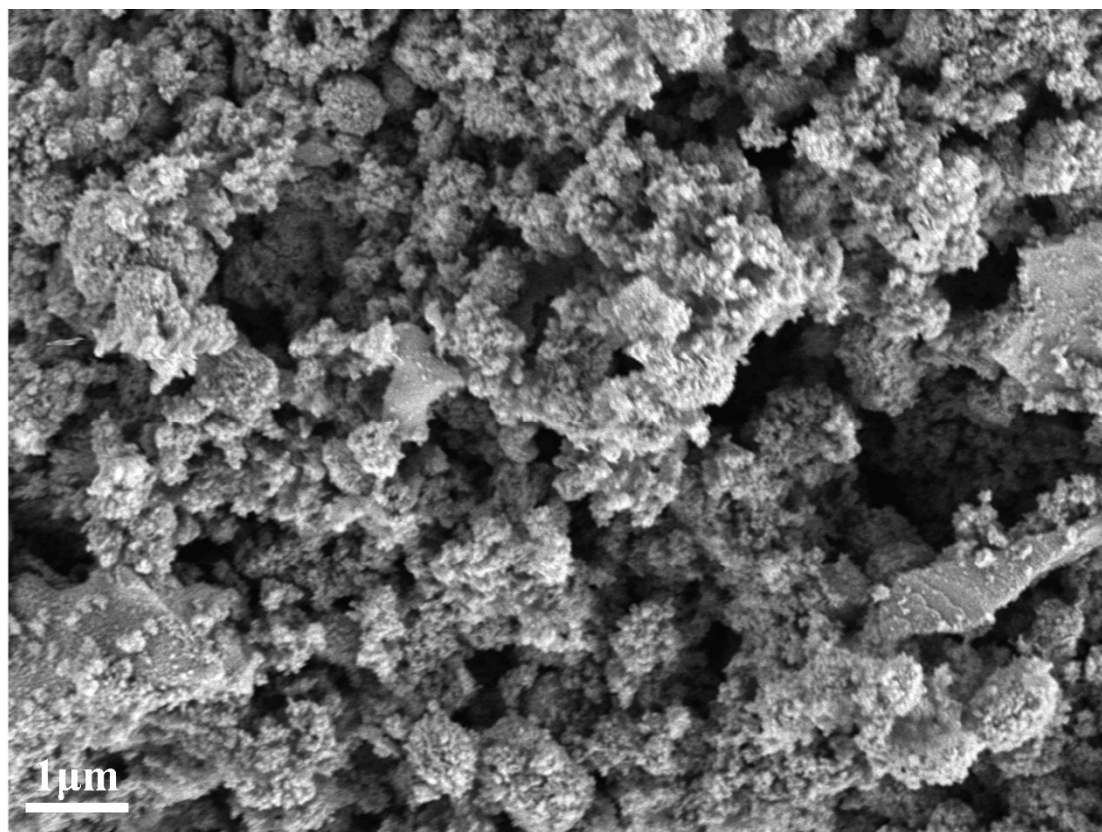

Fig. S9. SEM micrograph of MTBBP-ZSM-5 synthesized with  $\text{Na/Al} = 0$ .

Table S1. Textural properties of the synthesized samples derived from N<sub>2</sub> adsorption-desorption isotherms.

| Sample      | S <sub>BET</sub><br>(m <sup>2</sup> ·g <sup>-1</sup> ) | S <sub>ext</sub><br>(m <sup>2</sup> ·g <sup>-1</sup> ) | S <sub>micro</sub><br>(m <sup>2</sup> ·g <sup>-1</sup> ) | V <sub>total</sub><br>(cm <sup>3</sup> ·g <sup>-1</sup> ) | V <sub>micro</sub><br>(cm <sup>3</sup> ·g <sup>-1</sup> ) | V <sub>meso</sub><br>(cm <sup>3</sup> ·g <sup>-1</sup> ) |
|-------------|--------------------------------------------------------|--------------------------------------------------------|----------------------------------------------------------|-----------------------------------------------------------|-----------------------------------------------------------|----------------------------------------------------------|
| MTBBP       | 373                                                    | 195                                                    | 178                                                      | 0.40                                                      | 0.11                                                      | 0.29                                                     |
| TBTCP-ZSM-5 | 313                                                    | 137                                                    | 176                                                      | 0.22                                                      | 0.13                                                      | 0.09                                                     |
| DDAC-ZSM-5  | 317                                                    | 144                                                    | 173                                                      | 0.22                                                      | 0.09                                                      | 0.13                                                     |
| DDBAC-ZSM-5 | 326                                                    | 141                                                    | 185                                                      | 0.21                                                      | 0.10                                                      | 0.11                                                     |
